# Supplementary material for: Heterospin 2p–4f and 2p–3d–4f complexes constructed by a nitronyl nitroxide ligand: syntheses, structures and magnetic properties
Source: Royal Society of Chemistry journal article supplement (doi:10.1039/d2ce01344d), 2022-01-01
Supplement: d2ce01344d1.pdf [file d2ce01344d1.pdf]

## Supporting Information

### **Heterospin 2p-4f and 2p-3d-4f complexes constructed by a nitronyl nitroxide ligand: syntheses, structures and magnetic properties**

Juan Sun,\* Min Chen, Ying Li, Xingran Liu, Xinyang Fu, Lijun He, Chuanming Jin\*

Hubei Key Laboratory of Pollutant Analysis & Reuse Technology, College of Chemistry and Chemical Engineering, Hubei Normal University, Huangshi 435002, P. R. China.

\*E-mail: sunjuan@hbnu.edu.cn; cmjin@hbnu.edu.cn

**Table S1.** Selected bond lengths [Å] and angles [°] for **1**.

| <i>Bond distances</i> |           |                   |           |
|-----------------------|-----------|-------------------|-----------|
| Gd(2)-O(4)            | 2.381(7)  | Gd(1)-O(10)       | 2.393(7)  |
| Gd(2)-O(3)            | 2.394(7)  | Gd(1)-O(12)       | 2.399(7)  |
| Gd(2)-O(1)            | 2.407(7)  | Gd(1)-O(11)       | 2.400(7)  |
| Gd(2)-O(6)            | 2.420(7)  | Gd(1)-O(15)       | 2.407(7)  |
| Gd(2)-O(7)            | 2.424(7)  | Gd(1)-O(9)        | 2.416(7)  |
| Gd(2)-O(2)            | 2.436(7)  | Gd(1)-O(14)       | 2.437(7)  |
| Gd(2)-O(5)            | 2.508(8)  | Gd(1)-O(13)       | 2.509(8)  |
| Gd(2)-N(4)            | 2.511(7)  | Gd(1)-N(9)        | 2.512(8)  |
| Gd(2)-N(5)            | 2.668(9)  | Gd(1)-N(10)       | 2.656(8)  |
| O(7)-N(1)             | 1.283(11) | O(15)-N(6)        | 1.305(10) |
| O(8)-N(2)             | 1.262(12) | O(16)-N(7)        | 1.272(11) |
| <i>Angles</i>         |           |                   |           |
| O(4)-Gd(2)-O(3)       | 73.8(2)   | O(10)-Gd(1)-O(12) | 71.1(3)   |
| O(4)-Gd(2)-O(1)       | 69.4(3)   | O(10)-Gd(1)-O(11) | 72.9(3)   |
| O(3)-Gd(2)-O(1)       | 74.5(3)   | O(12)-Gd(1)-O(11) | 73.2(2)   |
| O(4)-Gd(2)-O(6)       | 84.3(2)   | O(10)-Gd(1)-O(15) | 138.3(2)  |
| O(3)-Gd(2)-O(6)       | 136.8(2)  | O(12)-Gd(1)-O(15) | 141.7(3)  |
| O(1)-Gd(2)-O(6)       | 131.5(3)  | O(11)-Gd(1)-O(15) | 91.3(2)   |
| O(4)-Gd(2)-O(7)       | 140.2(2)  | O(10)-Gd(1)-O(9)  | 70.2(2)   |
| O(3)-Gd(2)-O(7)       | 92.1(2)   | O(12)-Gd(1)-O(9)  | 133.8(3)  |
| O(1)-Gd(2)-O(7)       | 143.2(3)  | O(11)-Gd(1)-O(9)  | 72.1(2)   |
| O(6)-Gd(2)-O(7)       | 81.4(2)   | O(15)-Gd(1)-O(9)  | 68.2(2)   |
| O(4)-Gd(2)-O(2)       | 130.8(2)  | O(10)-Gd(1)-O(14) | 133.2(2)  |
| O(3)-Gd(2)-O(2)       | 69.6(2)   | O(12)-Gd(1)-O(14) | 85.5(3)   |
| O(1)-Gd(2)-O(2)       | 69.9(3)   | O(11)-Gd(1)-O(14) | 138.5(2)  |
| O(6)-Gd(2)-O(2)       | 144.5(2)  | O(15)-Gd(1)-O(14) | 83.8(2)   |
| O(7)-Gd(2)-O(2)       | 73.2(2)   | O(9)-Gd(1)-O(14)  | 140.3(2)  |
| O(4)-Gd(2)-O(5)       | 68.6(3)   | O(10)-Gd(1)-O(13) | 132.0(3)  |
| O(3)-Gd(2)-O(5)       | 69.6(3)   | O(12)-Gd(1)-O(13) | 68.8(3)   |
| O(1)-Gd(2)-O(5)       | 130.5(3)  | O(11)-Gd(1)-O(13) | 71.3(3)   |
| O(6)-Gd(2)-O(5)       | 67.9(3)   | O(15)-Gd(1)-O(13) | 73.2(3)   |
| O(7)-Gd(2)-O(5)       | 71.7(2)   | O(9)-Gd(1)-O(13)  | 125.0(2)  |
| O(2)-Gd(2)-O(5)       | 124.0(3)  | O(14)-Gd(1)-O(13) | 67.8(2)   |
| O(4)-Gd(2)-N(4)       | 137.6(2)  | O(10)-Gd(1)-N(9)  | 92.3(3)   |
| O(3)-Gd(2)-N(4)       | 140.5(2)  | O(12)-Gd(1)-N(9)  | 136.2(3)  |
| O(1)-Gd(2)-N(4)       | 93.6(3)   | O(11)-Gd(1)-N(9)  | 141.5(2)  |
| O(6)-Gd(2)-N(4)       | 78.9(2)   | O(15)-Gd(1)-N(9)  | 76.3(2)   |
| O(7)-Gd(2)-N(4)       | 75.0(2)   | O(9)-Gd(1)-N(9)   | 69.5(2)   |
| O(2)-Gd(2)-N(4)       | 70.9(2)   | O(14)-Gd(1)-N(9)  | 77.1(2)   |
| O(5)-Gd(2)-N(4)       | 135.6(3)  | O(13)-Gd(1)-N(9)  | 135.2(3)  |
| O(4)-Gd(2)-N(5)       | 75.7(2)   | O(10)-Gd(1)-N(10) | 70.3(3)   |
| O(3)-Gd(2)-N(5)       | 138.5(3)  | O(12)-Gd(1)-N(10) | 74.1(3)   |

---

|                 |          |                   |          |
|-----------------|----------|-------------------|----------|
| O(1)-Gd(2)-N(5) | 68.9(3)  | O(11)-Gd(1)-N(10) | 136.8(2) |
| O(6)-Gd(2)-N(5) | 65.4(3)  | O(15)-Gd(1)-N(10) | 131.5(2) |
| O(7)-Gd(2)-N(5) | 129.1(2) | O(9)-Gd(1)-N(10)  | 114.3(3) |
| O(2)-Gd(2)-N(5) | 113.2(3) | O(14)-Gd(1)-N(10) | 64.4(3)  |
| O(5)-Gd(2)-N(5) | 122.8(3) | O(13)-Gd(1)-N(10) | 120.5(3) |
| N(4)-Gd(2)-N(5) | 61.9(3)  | N(9)-Gd(1)-N(10)  | 62.1(3)  |
| N(1)-O(7)-Gd(2) | 140.2(6) | N(6)-O(15)-Gd(1)  | 135.1(6) |

---

**Table S2.** Selected bond lengths [Å] and angles [°] for **2**.

| <i>Bond distances</i> |            |                   |            |
|-----------------------|------------|-------------------|------------|
| Tb(2)-O(4)            | 2.369(5)   | Tb(1)-O(10)       | 2.369(5)   |
| Tb(2)-O(3)            | 2.379(5)   | Tb(1)-O(12)       | 2.372(5)   |
| Tb(2)-O(1)            | 2.384(6)   | Tb(1)-O(11)       | 2.382(5)   |
| Tb(2)-O(6)            | 2.395(5)   | Tb(1)-O(15)       | 2.397(5)   |
| Tb(2)-O(7)            | 2.401(5)   | Tb(1)-O(14)       | 2.407(5)   |
| Tb(2)-O(2)            | 2.415(5)   | Tb(1)-O(9)        | 2.417(5)   |
| Tb(2)-N(4)            | 2.482(6)   | Tb(1)-O(13)       | 2.499(5)   |
| Tb(2)-O(5)            | 2.513(6)   | Tb(1)-N(9)        | 2.503(6)   |
| Tb(2)-N(5)            | 2.661(6)   | Tb(1)-N(10)       | 2.649(6)   |
| O(7)-N(1)             | 1.300(8)   | O(16)-N(7)        | 1.285(8)   |
| O(8)-N(2)             | 1.276(9)   | O(15)-N(6)        | 1.284(8)   |
| <i>Angles</i>         |            |                   |            |
| O(4)-Tb(2)-O(3)       | 74.53(18)  | O(10)-Tb(1)-O(12) | 71.1(2)    |
| O(4)-Tb(2)-O(1)       | 69.57(19)  | O(10)-Tb(1)-O(11) | 73.12(18)  |
| O(3)-Tb(2)-O(1)       | 75.03(19)  | O(12)-Tb(1)-O(11) | 73.46(18)  |
| O(4)-Tb(2)-O(6)       | 83.96(18)  | O(10)-Tb(1)-O(15) | 138.85(18) |
| O(3)-Tb(2)-O(6)       | 137.17(19) | O(12)-Tb(1)-O(15) | 141.37(19) |
| O(1)-Tb(2)-O(6)       | 130.92(19) | O(11)-Tb(1)-O(15) | 91.33(18)  |
| O(4)-Tb(2)-O(7)       | 140.25(18) | O(10)-Tb(1)-O(14) | 133.20(18) |
| O(3)-Tb(2)-O(7)       | 92.03(19)  | O(12)-Tb(1)-O(14) | 85.26(19)  |
| O(1)-Tb(2)-O(7)       | 143.57(19) | O(11)-Tb(1)-O(14) | 138.26(18) |
| O(6)-Tb(2)-O(7)       | 81.30(18)  | O(15)-Tb(1)-O(14) | 83.34(18)  |
| O(4)-Tb(2)-O(2)       | 131.75(18) | O(10)-Tb(1)-O(9)  | 70.24(18)  |
| O(3)-Tb(2)-O(2)       | 69.63(18)  | O(12)-Tb(1)-O(9)  | 134.13(19) |
| O(1)-Tb(2)-O(2)       | 70.7(2)    | O(11)-Tb(1)-O(9)  | 72.43(17)  |
| O(6)-Tb(2)-O(2)       | 143.95(18) | O(15)-Tb(1)-O(9)  | 68.76(18)  |
| O(7)-Tb(2)-O(2)       | 72.84(19)  | O(14)-Tb(1)-O(9)  | 140.12(18) |
| O(4)-Tb(2)-N(4)       | 137.2(2)   | O(10)-Tb(1)-O(13) | 131.58(19) |
| O(3)-Tb(2)-N(4)       | 140.48(19) | O(12)-Tb(1)-O(13) | 68.7(2)    |
| O(1)-Tb(2)-N(4)       | 93.4(2)    | O(11)-Tb(1)-O(13) | 70.41(18)  |
| O(6)-Tb(2)-N(4)       | 78.52(19)  | O(15)-Tb(1)-O(13) | 72.74(19)  |
| O(7)-Tb(2)-N(4)       | 75.0(2)    | O(14)-Tb(1)-O(13) | 68.48(18)  |
| O(2)-Tb(2)-N(4)       | 70.88(19)  | O(9)-Tb(1)-O(13)  | 124.74(18) |
| O(4)-Tb(2)-O(5)       | 68.94(19)  | O(10)-Tb(1)-N(9)  | 92.65(19)  |
| O(3)-Tb(2)-O(5)       | 68.92(18)  | O(12)-Tb(1)-N(9)  | 136.44(19) |
| O(1)-Tb(2)-O(5)       | 130.51(18) | O(11)-Tb(1)-N(9)  | 141.44(18) |
| O(6)-Tb(2)-O(5)       | 68.88(18)  | O(15)-Tb(1)-N(9)  | 75.98(19)  |
| O(7)-Tb(2)-O(5)       | 71.32(18)  | O(14)-Tb(1)-N(9)  | 77.13(19)  |
| O(2)-Tb(2)-O(5)       | 122.96(19) | O(9)-Tb(1)-N(9)   | 69.02(18)  |
| N(4)-Tb(2)-O(5)       | 135.8(2)   | O(13)-Tb(1)-N(9)  | 135.4(2)   |
| O(4)-Tb(2)-N(5)       | 75.04(19)  | O(10)-Tb(1)-N(10) | 70.05(19)  |

---

|                 |            |                   |            |
|-----------------|------------|-------------------|------------|
| O(3)-Tb(2)-N(5) | 138.7(2)   | O(12)-Tb(1)-N(10) | 73.79(19)  |
| O(1)-Tb(2)-N(5) | 68.6(2)    | O(11)-Tb(1)-N(10) | 136.74(19) |
| O(6)-Tb(2)-N(5) | 64.94(19)  | O(15)-Tb(1)-N(10) | 131.63(18) |
| O(7)-Tb(2)-N(5) | 129.00(19) | O(14)-Tb(1)-N(10) | 64.67(19)  |
| O(2)-Tb(2)-N(5) | 113.79(19) | O(9)-Tb(1)-N(10)  | 114.01(19) |
| N(4)-Tb(2)-N(5) | 62.1(2)    | O(13)-Tb(1)-N(10) | 121.14(19) |
| O(5)-Tb(2)-N(5) | 123.24(19) | N(9)-Tb(1)-N(10)  | 62.65(19)  |
| N(1)-O(7)-Tb(2) | 140.6(4)   | N(6)-O(15)-Tb(1)  | 134.7(4)   |

---

**Table S3.** Selected bond lengths [Å] and angles [°] for **3**.

| <i>Bond distances</i> |            |                  |            |
|-----------------------|------------|------------------|------------|
| Tb(1)-O(10)           | 2.351(4)   | Cu(2)-O(4)       | 1.931(4)   |
| Tb(1)-O(11)           | 2.408(4)   | Cu(2)-O(2)       | 1.962(4)   |
| Tb(1)-O(5)            | 2.364(4)   | Cu(2)-N(3)       | 2.009(5)   |
| Tb(1)-O(12)           | 2.346(4)   | Cu(2)-N(4)       | 1.970(5)   |
| Tb(1)-O(6)            | 2.394(4)   | Cu(2)-O(3)       | 2.191(5)   |
| Tb(1)-O(7)            | 2.348(5)   | O(2)-N(2)        | 1.306(6)   |
| Tb(1)-O(8)            | 2.353(4)   | O(1)-N(1)        | 1.262(6)   |
| Tb(1)-O(9)            | 2.360(4)   |                  |            |
| <i>Angles</i>         |            |                  |            |
| O(10)-Tb(1)-O(11)     | 73.82(15)  | O(7)-Tb(1)-O(9)  | 85.95(16)  |
| O(10)-Tb(1)-O(5)      | 72.83(15)  | O(8)-Tb(1)-O(11) | 120.01(16) |
| O(10)-Tb(1)-O(6)      | 119.45(15) | O(8)-Tb(1)-O(5)  | 152.38(16) |
| O(10)-Tb(1)-O(8)      | 133.19(16) | O(8)-Tb(1)-O(6)  | 84.81(16)  |
| O(10)-Tb(1)-O(9)      | 72.93(15)  | O(8)-Tb(1)-O(9)  | 71.84(16)  |
| O(5)-Tb(1)-O(11)      | 71.07(16)  | O(9)-Tb(1)-O(11) | 70.04(16)  |
| O(5)-Tb(1)-O(6)       | 71.52(16)  | O(9)-Tb(1)-O(5)  | 133.65(16) |
| O(12)-Tb(1)-O(10)     | 140.53(15) | O(9)-Tb(1)-O(6)  | 154.36(16) |
| O(12)-Tb(1)-O(11)     | 71.09(15)  | O(4)-Cu(2)-O(2)  | 91.38(17)  |
| O(12)-Tb(1)-O(5)      | 79.14(16)  | O(4)-Cu(2)-N(3)  | 172.85(19) |
| O(12)-Tb(1)-O(6)      | 75.23(15)  | O(4)-Cu(2)-N(4)  | 93.74(19)  |
| O(12)-Tb(1)-O(7)      | 143.69(15) | O(4)-Cu(2)-O(3)  | 90.33(18)  |
| O(12)-Tb(1)-O(8)      | 81.22(16)  | O(2)-Cu(2)-N(3)  | 91.26(18)  |
| O(12)-Tb(1)-O(9)      | 110.37(15) | O(2)-Cu(2)-N(4)  | 159.72(19) |
| O(6)-Tb(1)-O(11)      | 133.26(16) | O(2)-Cu(2)-O(3)  | 97.92(17)  |
| O(7)-Tb(1)-O(10)      | 74.45(15)  | N(3)-Cu(2)-O(3)  | 95.89(19)  |
| O(7)-Tb(1)-O(11)      | 144.59(16) | N(4)-Cu(2)-N(3)  | 81.6(2)    |
| O(7)-Tb(1)-O(5)       | 113.45(17) | N(4)-Cu(2)-O(3)  | 101.65(19) |
| O(7)-Tb(1)-O(6)       | 77.10(16)  | N(2)-O(2)-Cu(2)  | 117.8(3)   |
| O(7)-Tb(1)-O(8)       | 73.27(16)  |                  |            |

**Table S4** SHAPE analysis for complexes **1** and **2**.

| Compound     | JCSAPR-9 | CSAPR-9      | JTCTPR-9 | TCTPR-9      | MFF-9 |
|--------------|----------|--------------|----------|--------------|-------|
| <b>1</b> Gd1 | 1.722    | <b>0.802</b> | 1.804    | <b>0.589</b> | 1.465 |
| <b>1</b> Gd2 | 1.642    | <b>0.809</b> | 1.895    | <b>0.695</b> | 1.463 |
| <b>2</b> Tb1 | 1.638    | <b>0.769</b> | 1.725    | <b>0.582</b> | 1.465 |
| <b>2</b> Tb2 | 1.614    | <b>0.821</b> | 1.792    | <b>0.693</b> | 1.462 |

**Table S5.** SHAPE analysis for the Tb coordination sphere of **3**.

| Compound | SAPR-8 | TDD-8 | JBTPR-8 | BTPR-8 |
|----------|--------|-------|---------|--------|
| <b>3</b> | 0.647  | 1.469 | 2.728   | 2.160  |

**Table S6.** The substates and corresponding energy levels **3**.

| $ M_J\rangle$ | $E(\text{cm}^{-1})$ |
|---------------|---------------------|
| $\pm 6$       | 0                   |
| $\pm 5$       | 173.2               |
| $\pm 4$       | 214.0               |
| $\pm 3$       | 224.4               |
| $\pm 2$       | 237.7               |
| $\pm 1$       | 252.9               |
| 0             | 259.6               |

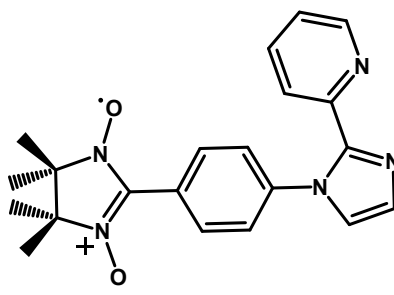**Scheme S1.** Nit-Ph-PyIm radical ligand.

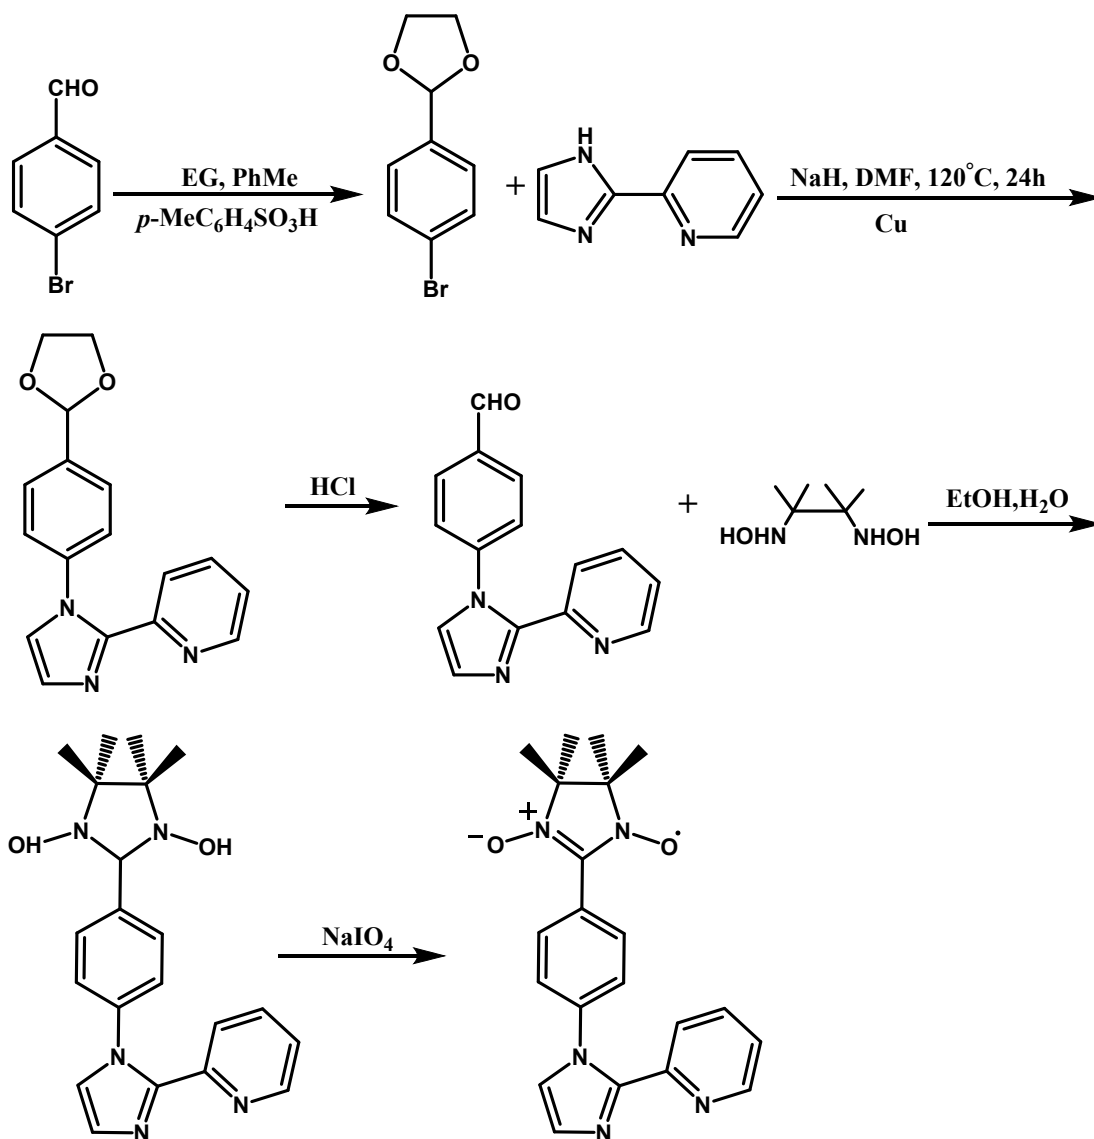

**Scheme S2.** The synthesis of Nit-Ph-PyIm biradical ligand (EG: ethylene glycol).

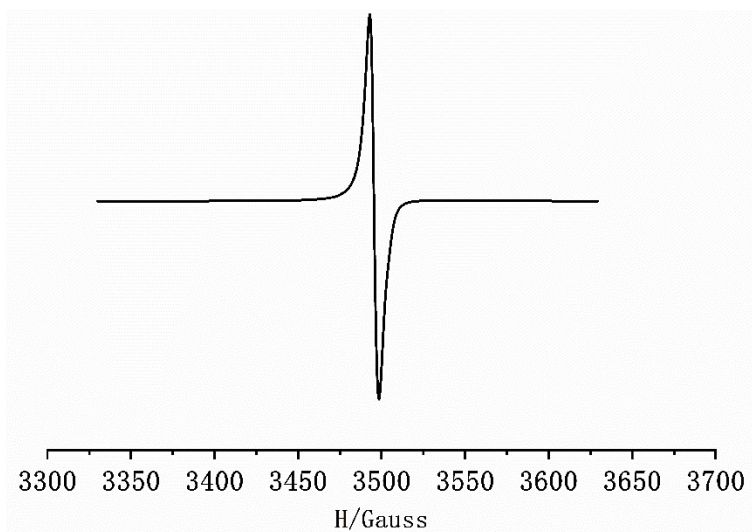

**Fig. S1** EPR spectrum of the radical ligand Nit-Ph-PyIm.



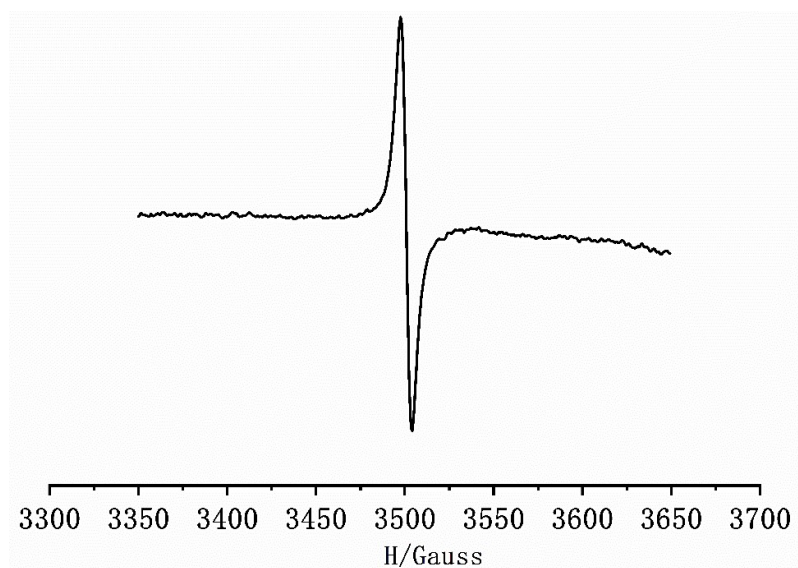

**Fig. S2** EPR spectrum of the complex 1.

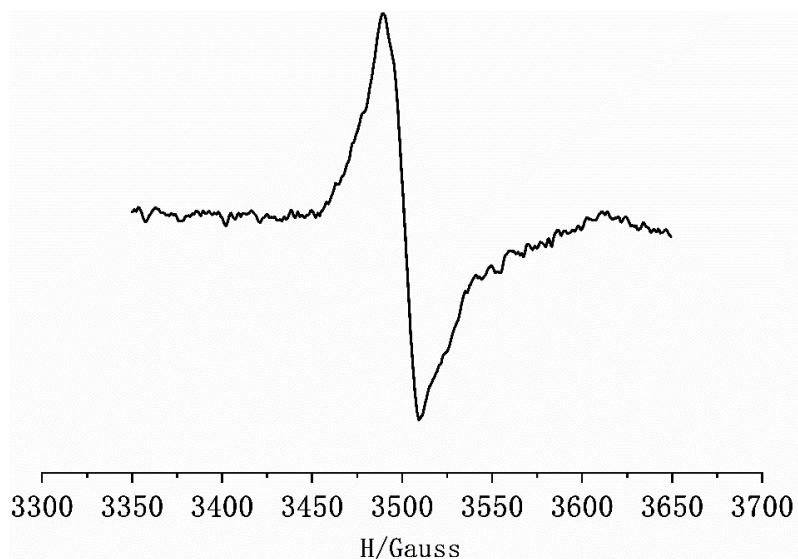

**Fig. S3** EPR spectrum of the complex 2.

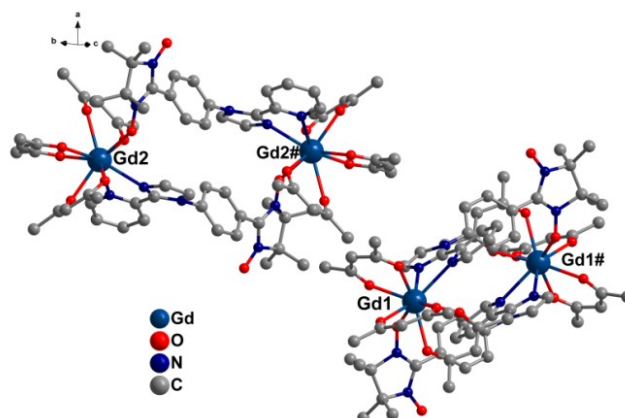

**Fig. S4** Crystal structure of complex 1 (All hydrogen, fluorine atoms and CHCl<sub>3</sub> are omitted for clarity).

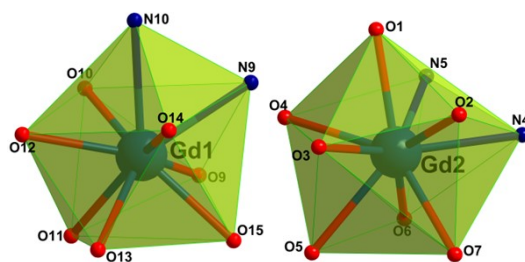

**Fig. S5** Coordination polyhedron of Gd ions in complex **1**.

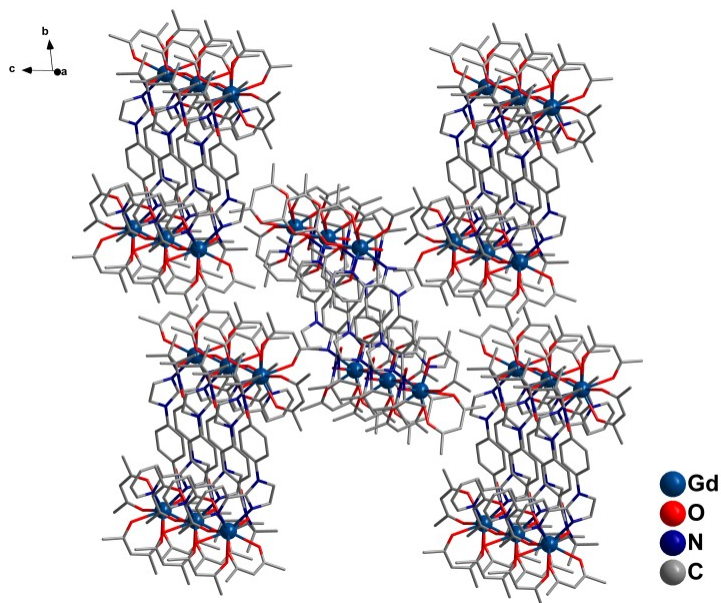

**Fig. S6** Packing diagram of complex **1**, hydrogen, fluorine atoms and  $\text{CHCl}_3$  are not shown for the sake of clarity.

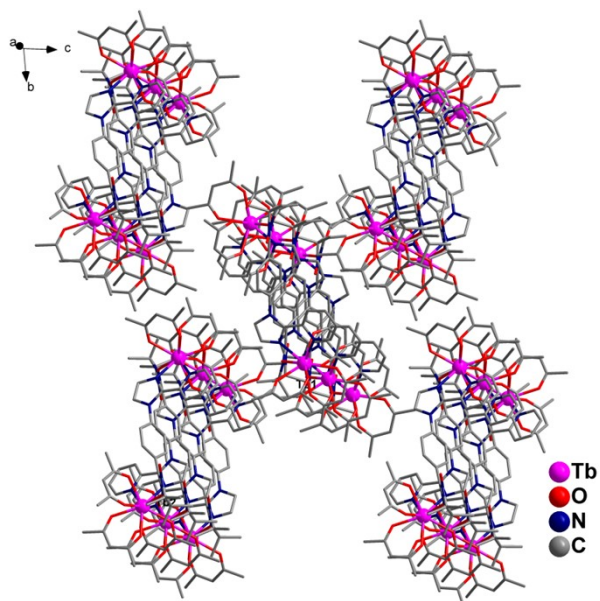

**Fig. S7** Packing diagram of complex **2**, hydrogen, fluorine atoms and  $\text{CHCl}_3$  are not shown for the sake of clarity.

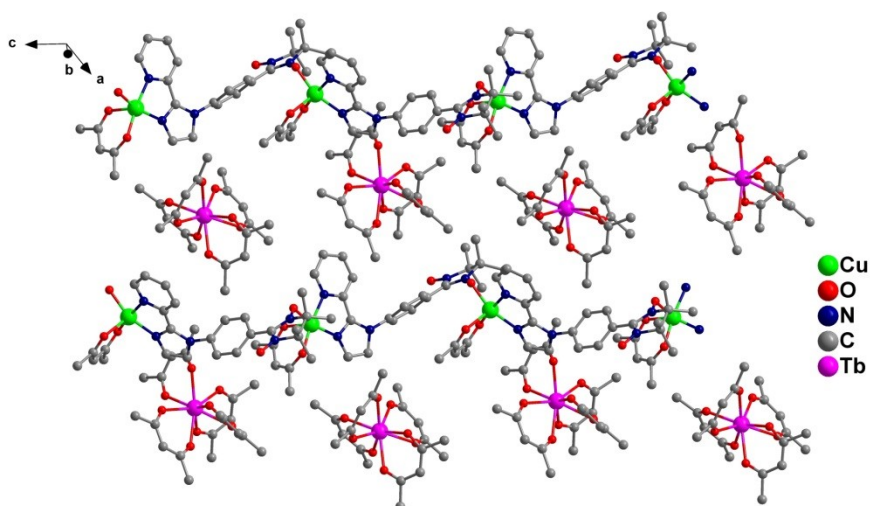

**Fig. S8** Packing arrangement of **3** (H and F atoms are omitted for clarity).

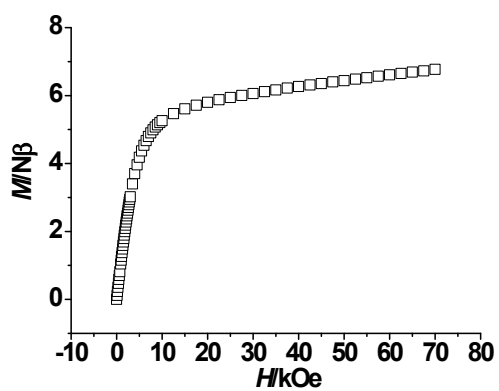

**Fig. S9**  $M$  versus  $H$  curve for complex **2** at 2.0 K.

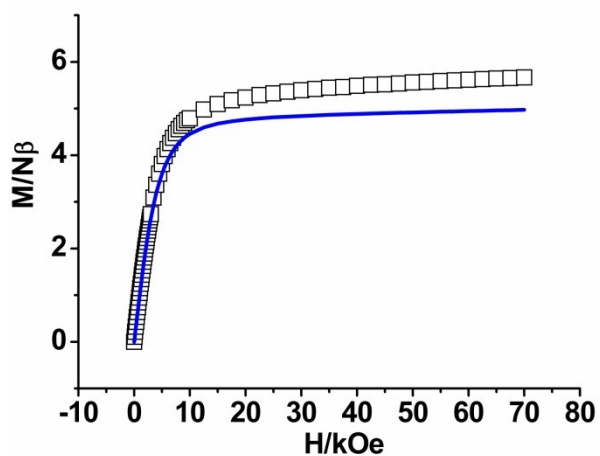

**Fig. S10**  $M$  versus  $H$  curve for complex **3** at 2.0 K, the solid is fitted and simulated by the PHI program.

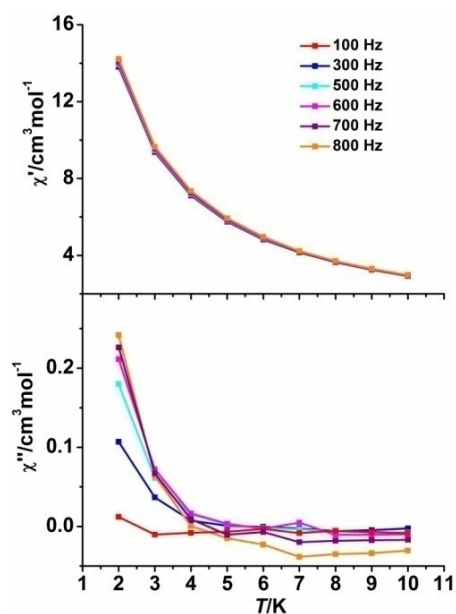

**Fig. S11** Temperature dependence of the  $\chi'$  (top) and  $\chi''$  (bottom) under zero dc field for compound **2** at different frequencies.

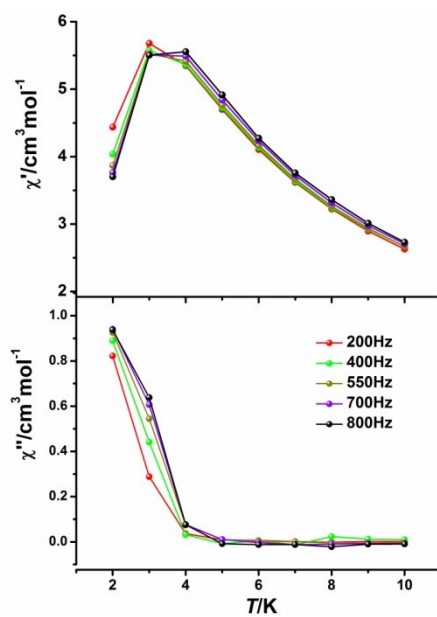

**Fig. S12** Temperature dependence of the  $\chi'$  (top) and  $\chi''$  (bottom) under 3000 Oe dc field for compound **2** at different frequencies.

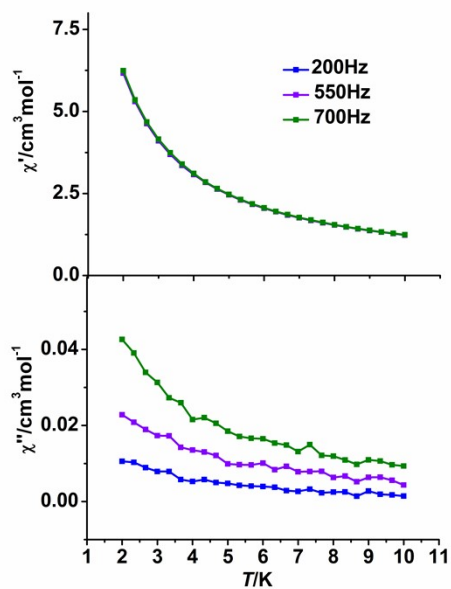

**Fig. S13** Temperature dependence of the  $\chi'$  (top) and  $\chi''$  (bottom) under zero dc field for compound **3** at different frequencies.
